# Supplementary material for: HbA1c as screening for gestational diabetes mellitus in women with polycystic ovary syndrome
Source: Springer Nature journal article supplement (doi:10.1186/s12902-015-0039-9), 2015-08-05
Supplement: MOESM1 [file 9753928]

| Characteristic           | Using metformin at conception            |                                    |                                          |                                     | Randomised to metformin |                  |                           |                  | Using metformin at conception and/or randomised to metformin |                      |                              |                     |
|--------------------------|------------------------------------------|------------------------------------|------------------------------------------|-------------------------------------|-------------------------|------------------|---------------------------|------------------|--------------------------------------------------------------|----------------------|------------------------------|---------------------|
|                          | Yes                                      |                                    | No                                       |                                     | Yes                     |                  | No                        |                  | Yes                                                          |                      | No                           |                     |
|                          | GDM-WHO<br>N=18 (25%)                    | NGT-WHO<br>N=55                    | GDM-WHO<br>N=37 (24%)                    | NGT-WHO<br>N=118                    | GDM-WHO<br>N=28 (25%)   | NGT-WHO<br>N=86  | GDM-<br>WHO N=27<br>(24%) | NGT-WHO<br>N=87  | GDM-WHO<br>N=37 (25%)                                        | NGT-<br>WHO<br>N=112 | GDM-<br>WHO<br>N=18<br>(23%) | NGT-<br>WHO<br>N=61 |
| Age (years)              | 31 (25-40)                               | 29 (20-38)                         | 30 (22-44)                               | 29 (19-39)                          | 31 (23-44)              | 29 (19-39)       | 31 (22-36)                | 29 (20-39)       | 31 (23-44)                                                   | 29 (19-39)           | 31 (22-36)                   | 29 (21-39)          |
| BMI (kg/m <sup>2</sup> ) | 29.1 (22.6-45.7)                         | 27.3 (18.8-46.2)                   | 28.9 (19.6-44.2)                         | 26.2 (19.0-50.2)                    | 28.2 (20.1-44.2)        | 27.5 (19.0-50.2) | 29.8 (19.6-45.7)          | 25.9 (18.8-44.8) | 29.8 (20.1-45.7)                                             | 27.2 (18.8-50.2)     | 28.6 (19.6-43.9)             | 25.8 (19.0-44.8)    |
| HbA1c (%)                | 5.2 (4.7-6.3)                            | 5.1 (4.7-5.6)                      | 5.1 (4.9-6.6)                            | 5.1 (4.6-5.6)                       | 5.3 (4.8-6.3)           | 5.2 (4.7-5.6)    | 5.1 (4.7-6.6)             | 5.1 (4.6-5.6)    | 5.2 (4.7-6.3)                                                | 5.2 (4.7-5.6)        | 5.1 (4.9-6.6)                | 5.1 (4.6-5.6)       |
| Birth weight (g)         | 3590 (2995-4730)                         | 3702 (2275-4750)                   | 3405 (165-4150)                          | 3520 (1530-4840)                    | 3593 (2330-4730)        | 3520 (1530-4520) | 3410 (165-4480)           | 3734 (1840-4840) | 3580 (2330-4730)                                             | 3555 (1530-4750)     | 3175 (165-3960)              | 3728 (1840-4840)    |
| Nulliparity (no.)        | 7 (39)                                   | 38 (69)                            | 21 (57)                                  | 66 (56)                             | 16 (57)                 | 51 (59)          | 12 (44)                   | 53 (61)          | 18 (49)                                                      | 70 (63)              | 10 (56)                      | 34 (56)             |
|                          | GDM-WHO first trimester<br>N=10 (14%)    | NGT-WHO first trimester<br>N=62    | GDM-WHO first trimester<br>N=10 (6.5%)   | NGT-WHO first trimester<br>N=144    |                         |                  |                           |                  |                                                              |                      |                              |                     |
| Age (years)              | 32 (25-40)                               | 31 (20-40)                         | 33 (25-44)                               | 29 (19-39)                          |                         |                  |                           |                  |                                                              |                      |                              |                     |
| BMI (kg/m <sup>2</sup> ) | 31.7 (24.7-45.7)                         | 27.0 (18.8-46.2)                   | 30.7 (24.2-40.4)                         | 26.7 (19.0-50.2)                    |                         |                  |                           |                  |                                                              |                      |                              |                     |
| HbA1c (%)                | 5.3 (4.7-6.3)                            | 5.1 (4.7-5.6)                      | 5.2 (4.9-6.6)                            | 5.1 (4.6-5.6)                       |                         |                  |                           |                  |                                                              |                      |                              |                     |
| Birth weight (g)         | 3716 (3540-4730)                         | 3668 (2275-4750)                   | 3088 (165-4150)                          | 3500 (1530-4840)                    |                         |                  |                           |                  |                                                              |                      |                              |                     |
| Nulliparity (no.)        | 4 (40)                                   | 40 (65)                            | 5 (50)                                   | 82 (57)                             |                         |                  |                           |                  |                                                              |                      |                              |                     |
|                          | GDM-IADPSG first trimester<br>N=16 (22%) | NGT-IADPSG first trimester<br>N=56 | GDM-IADPSG first trimester<br>N=19 (12%) | NGT-IADPSG first trimester<br>N=135 |                         |                  |                           |                  |                                                              |                      |                              |                     |
| Age (years)              | 31 (22-36)                               | 31 (20-40)                         | 32 (23-44)                               | 29 (19-39)                          |                         |                  |                           |                  |                                                              |                      |                              |                     |
| BMI (kg/m <sup>2</sup> ) | 29.0 (18.8-45.7)                         | 28.1 (19.9-46.2)                   | 29.8 (20.0-40.5)                         | 26.6 (19.0-50.2)                    |                         |                  |                           |                  |                                                              |                      |                              |                     |
| HbA1c (%)                | 5.1 (4.7-6.3)                            | 5.2 (4.7-5.7)                      | 5.0 (4.9-6.6)                            | 5.1 (4.6-5.6)                       |                         |                  |                           |                  |                                                              |                      |                              |                     |
| Birth weight (g)         | 3570 (3236-4730)                         | 3720 (2275-4750)                   | 3495 (414-4280)                          | 3470 (165-4840)                     |                         |                  |                           |                  |                                                              |                      |                              |                     |
| Nulliparity (no.)        | 11 (69)                                  | 33 (59)                            | 11 (58)                                  | 76 (56)                             |                         |                  |                           |                  |                                                              |                      |                              |                     |

Appendix Table 5. Main characteristics of study participants by metformin use and GDM status. Numbers are median (min-max) or N (%).
